# Supplementary material for: Fucoidan Inhibition of Osteosarcoma Cells is Species and Molecular Weight Dependent
Source: PubMed Central journal article supplement (PMC7074035; doi:10.3390/md18020104), 2020-02-08
Supplement: marinedrugs-18-00104-s001.pdf [file marinedrugs-18-00104-s001.pdf]

# Supplementary

## Fucoidan inhibition of osteosarcoma cells is species and molecular weight dependent

Dhanak Gupta<sup>1,2</sup>, Melissa Silva<sup>3</sup>, Karolina Radziun<sup>1,2,4</sup>, Diana C. Martinez<sup>1</sup>, Christopher Hill<sup>5</sup>, Julie Marshall<sup>2</sup>, Vanessa L. Hearnden<sup>1</sup>, Miguel A. Puertas-Mejia<sup>4</sup> and Gwendolen C. Reilly<sup>1,2\*</sup>

<sup>1</sup> Department of Materials Science and Engineering, University of Sheffield, UK.

<sup>2</sup> Insigneo Institute for in Silico Medicine, University of Sheffield, Sheffield, UK.

<sup>3</sup> Institute of Chemistry, University of Antioquia, Medellín, Colombia.

<sup>4</sup> Cell Bank, Department of Cell Biology, Faculty of Biochemistry, Biophysics and Biotechnology, Jagiellonian University, Krakow, Poland.

<sup>5</sup> Department of Biomedical Science, University of Sheffield, Sheffield, UK.

\*Correspondence: Department of Materials Science and Engineering and INSIGNEO Institute for in silico Medicine, The Pam Liversidge Building (C+04), The Sir Robert Hadfield Building, Mappin Street, Sheffield, S1 3JD, UK. E-mail: g.reilly@sheffield.ac.uk

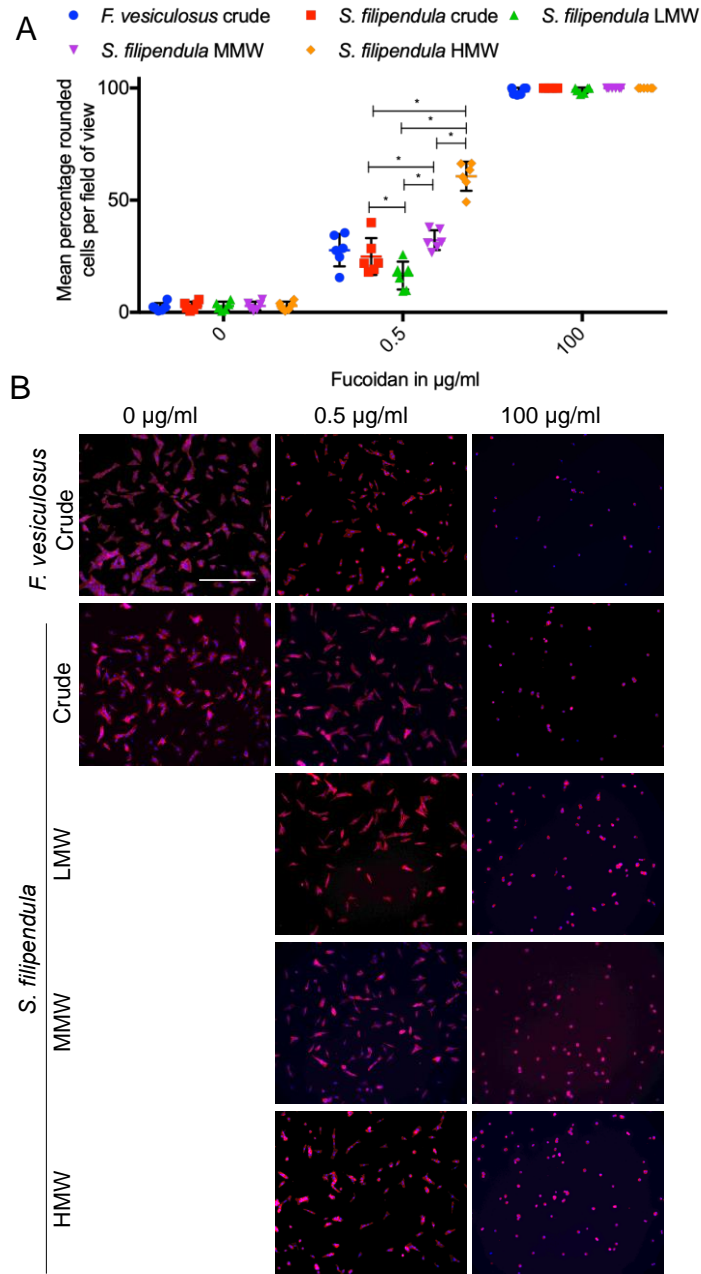

**Figure S1:** Assessment of MG63 cell morphology by actin staining. A) Mean  $\pm$  S.D. of MG63 cells with round morphology after seeding in the presence of different doses of fucoidans ( $n = 6$ ). B) Representative overlay images of actin (red) and DAPI (blue) stained MG63 cells treated with 0, 0.5 and 100  $\mu\text{g/ml}$  of different fucoidan. Scale bar, 500  $\mu\text{m}$ . \*  $p < 0.05$ , #  $p < 0.05$  relative to respective vehicle controls.

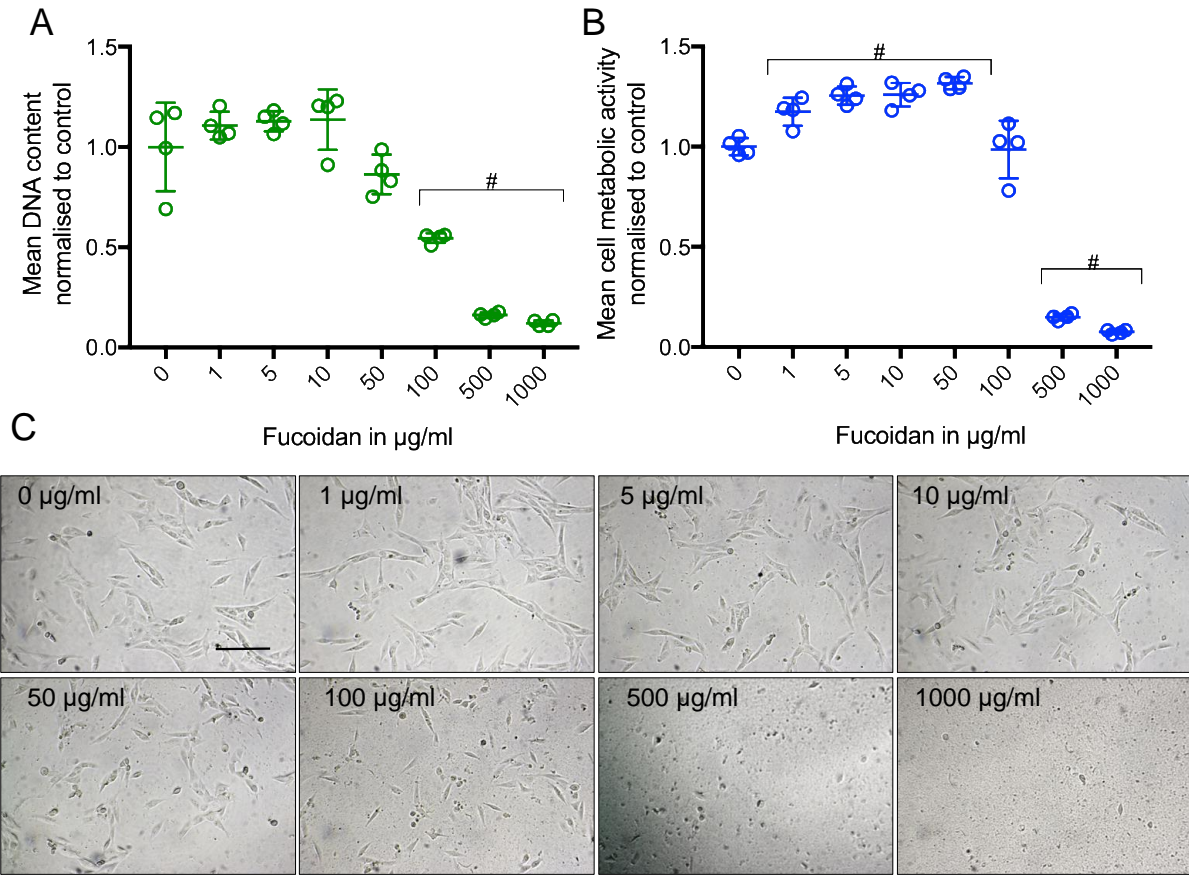

**Figure S2:** Toxicity of crude fucoidan derived from *F. vesiculosus* on MG63 cells after 1 day of treatment. Presto Blue™ assay for cell metabolic activity and Pico Green assay for DNA content measurements were performed (n = 4). Scale bar, 200 µm. Mean ± S.D. values are shown. # p < 0.05 relative to vehicle control.

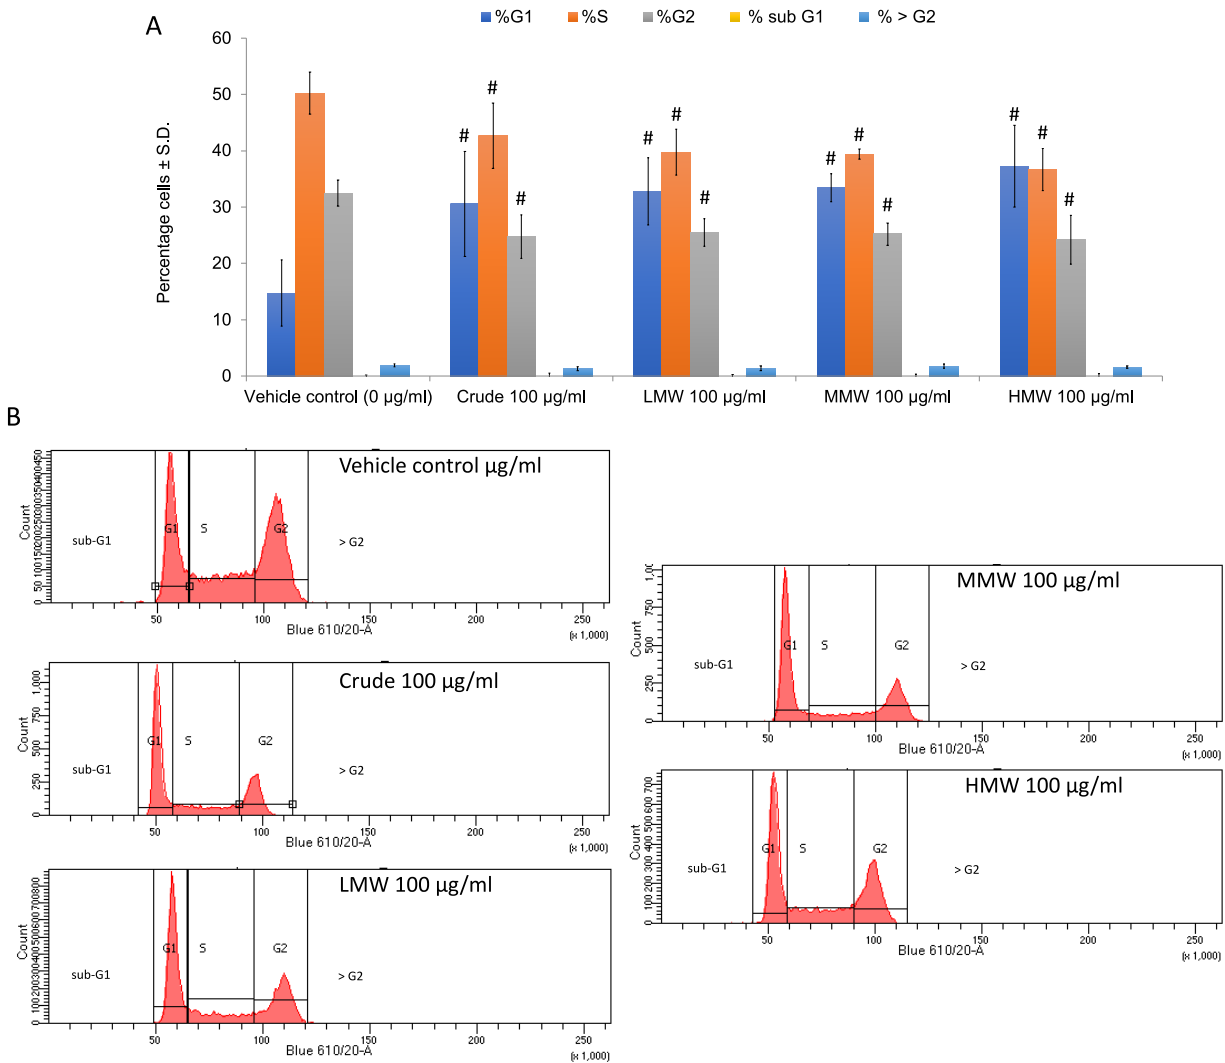

**Figure S3:** Cell cycle analysis on Day 2 of treatment with 100 µg/ml of *S. filipendula* fucoidans (crude, LMW, MMW and HMW). (A) Mean and S.D. of cells in different phases of cell cycle (n = 3). (B) Representative histograms of cells in sub-G1, G1, S, G2 and > G2 phases in different conditions. There was consistent rise in G1 populations and drop in S and G2 populations after treatment with any of the fucoidans compared to vehicle control (0 µg/ml) and this clearly shows G1 arrest due to these fucoidans. # p < 0.05 relative to respective vehicle controls.

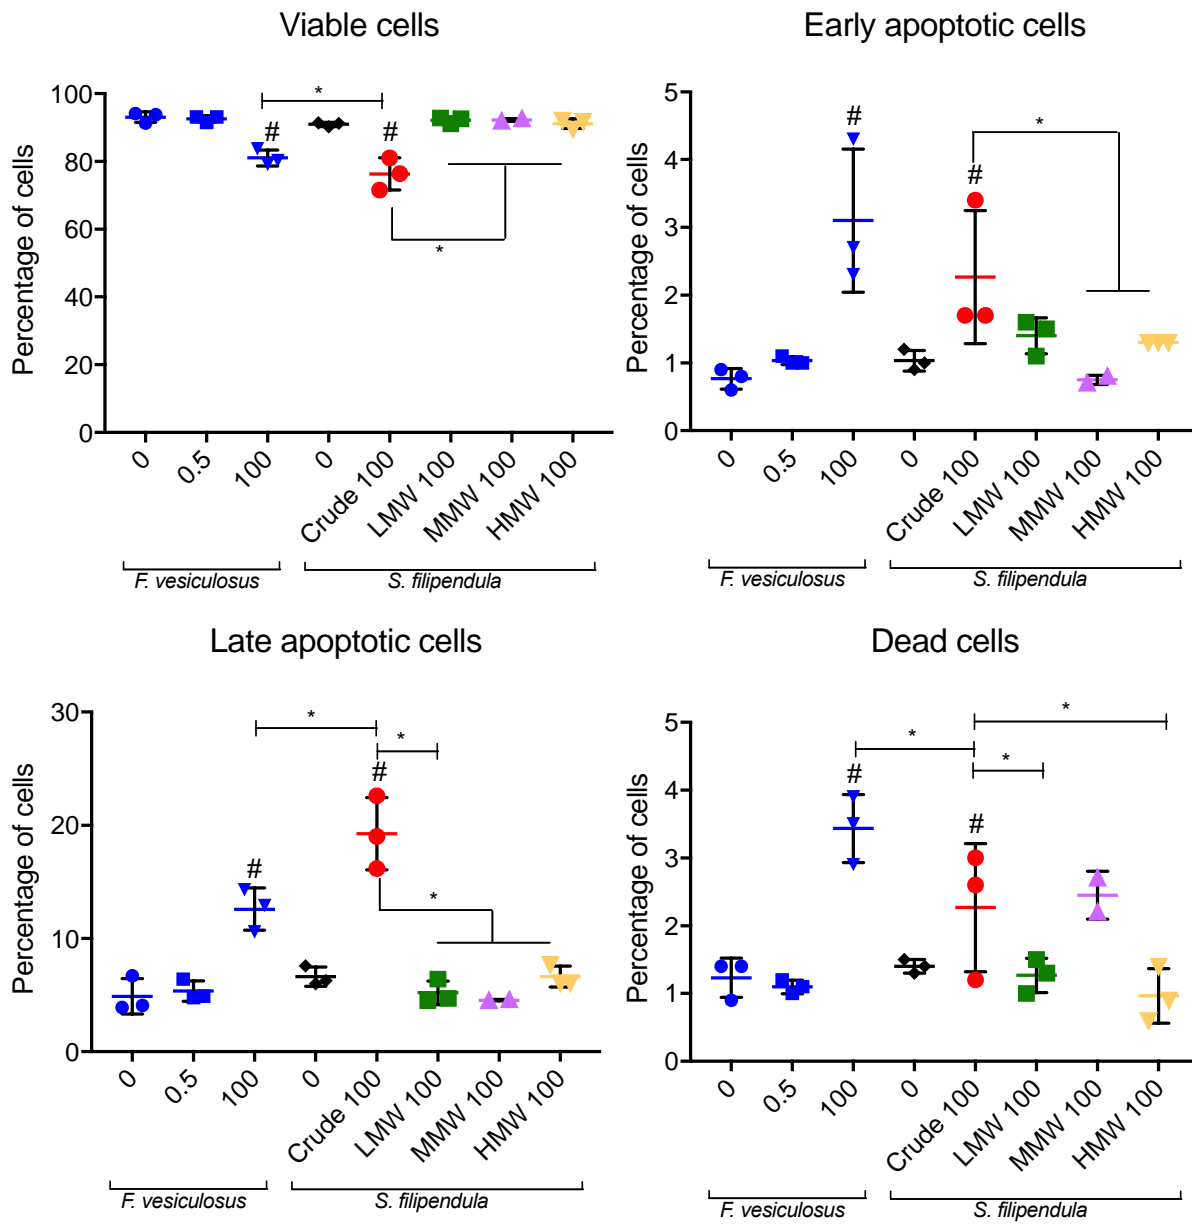

**Figure S4:** Mean ± S.D. of viable, early apoptotic, late apoptotic and dead MG63 cells as seen through Annexin V/PI staining on day 3 of treatment with different fucoidans. \*  $p < 0.05$ , #  $p < 0.05$  relative to respective vehicle controls.
